# Supplementary material for: Changes in Liver Stiffness and Markers of Liver Synthesis and Portal Hypertension following Hepatitis C Virus Eradication in Cirrhotic Individuals
Source: MDPI journal article supplement (doi:10.3390/biology11081160), 2022-08-02
Supplement: s1 [file s1]

**Supplementary Table S1.** Direct Antiviral Agents (DDA) regimens administered to the study cohort.

| <b>DAA regimens</b>                                           | <b>N (%)</b> |
|---------------------------------------------------------------|--------------|
| Sofosbuvir/Ledipasvir (+/- Ribavirin)                         | 200 (53.6%)  |
| Sofosbuvir (+/- Ribavirin)                                    | 52 (13.9%)   |
| Paritaprevir/Ritonavir/Ombitasvir + Dasabuvir (+/- Ribavirin) | 42 (11.3%)   |
| Sofosbuvir + Daclatasvir (+/- Ribavirin)                      | 28 (7.5%)    |
| Sofosbuvir/Velpatasvir (+/- Ribavirin)                        | 22 (5.9%)    |
| Sofosbuvir + Simeprevir (+/- Ribavirin)                       | 15 (4.0%)    |
| Paritaprevir/Ritonavir/Ombitasvir (+/- Ribavirin)             | 10 (2.7%)    |
| Sofosbuvir + Velpatasvir + Voxilaprevir (+/- Ribavirin)       | 2 (0.5%)     |
| Elbasvir/Grazoprevir (+/- Ribavirin)                          | 1 (0.3%)     |
| Glecaprevir + Pibrentasvir (+/- Ribavirin)                    | 1 (0.3%)     |
